# Supplementary material
Source: PubMed Central journal article supplement (PMC5581213)
Supplement: NIHMS892583-supplement-Online_Supplement.pdf [file NIHMS892583-supplement-Online_Supplement.pdf]

## Online Supplemental Data

### **An Unbiased High Throughput Screen to Identify Novel Effectors that Impact on Cardiomyocyte Aggregate Levels**

Patrick M. McLendon<sup>a,†\*</sup>, Gregory Davis<sup>a</sup>, James Gulick<sup>a</sup>, Sonia Singh<sup>a</sup>, Na Xu<sup>a</sup>, Nathan Salomonis<sup>b</sup>, Jeffery D. Molkenin<sup>a</sup> and Jeffrey Robbins<sup>a,\*</sup>

From the <sup>a</sup>Division of Molecular Cardiovascular Biology, the Heart Institute, and the <sup>b</sup>Division of Biomedical Informatics, Cincinnati Children's Hospital, Cincinnati, Ohio. <sup>†</sup>UES, <sup>\*</sup>Corresponding authors.

\*Correspondence to: Jeffrey Robbins 240 Sabin Way, MLC7020, Cincinnati Children's Hospital, Cincinnati OH, 45229-3039. Email [Jeff.Robbins@cchmc.org](mailto:Jeff.Robbins@cchmc.org) or Patrick M. McLendon, UES, Inc., 4401 Dayton-Xenia Rd, Dayton, OH 45432. Email: [pmclendon@ues.com](mailto:pmclendon@ues.com)

**Table I: Optimizing shRNA lentivirus Screen**

| Parameter                            | Key Variable                                                                  | Already defined?                                                                                                                                                                                                                                                                                         |
|--------------------------------------|-------------------------------------------------------------------------------|----------------------------------------------------------------------------------------------------------------------------------------------------------------------------------------------------------------------------------------------------------------------------------------------------------|
| Cell or cell line                    | Transfection efficiency, aggregate formation                                  | Normal mouse neonatal cardiomyocytes                                                                                                                                                                                                                                                                     |
| media                                | Must not interfere with readout or transfection efficiency                    | Yes                                                                                                                                                                                                                                                                                                      |
| shRNA                                | concentration must produce effective silencing and limited off-target effects | TBD using 5 separate targets chosen on the basis of our first screen.                                                                                                                                                                                                                                    |
| Plate format                         | Either 96 or 384 well plates                                                  | 96 well plates will probably be used as we have found that more useful for staging and decreasing edge effects                                                                                                                                                                                           |
| +/- shRNA controls                   | Present on each plate: should have no/large measurable effect on the readout  | The negative control is a mix of 5 scrambled shRNAs. The positive control is two-fold: treatment with Torin1, an mTORC inhibitor that activates autophagy;* and lentivirus containing <i>atg7</i> , whose overexpression we have shown is very effective at decreasing preformed aggregates/PAO [13, 31] |
| Transfection reagent                 | Can introduce the shRNA into cells with minimal toxicity                      | Our shRNA lentivirus have been optimized for this                                                                                                                                                                                                                                                        |
| Transfection reagent incubation time | Sufficient time for the shRNA to be expressed and complex with targets        | At least 12 hrs so this will not be an issues for the screen as readouts will be days or even weeks later                                                                                                                                                                                                |
| Cell volume, number,                 | Reproducibility and                                                           | Automated additions and                                                                                                                                                                                                                                                                                  |

|                                     |                                            |                                                                                                                                                            |
|-------------------------------------|--------------------------------------------|------------------------------------------------------------------------------------------------------------------------------------------------------------|
| addition of reagents                | plate to plate and well to well variations | readouts, together with controls on each plate and multiple readouts (25 discrete areas/well) ensure reproducibility                                       |
| Incubation time for readout reagent | Clearance of CryAB-positive aggregates     | A time course with a positive control (eg Torin1) will be carried out to determine the best time to optimize readout while minimizing time and cell death. |
| Readout methodology                 | Accuracy and sensitivity                   | Parameters established during the first screen will serve as a starting point.                                                                             |

\*See **Figure 3** for Torin1's effect on aggregate formation

**Table II. Validation Screening List of positives**

| Accession          | Gene ID        | Accession          | Gene ID       | Accession        | Gene ID       | Accession | Gene ID     |
|--------------------|----------------|--------------------|---------------|------------------|---------------|-----------|-------------|
| NM_018829.2        | Ap3m1          | XM_139298.4        | Prkaa1        | NM_145840        | Rgs9bp        | NM_019741 | Slc2a5      |
| XM_147046.2        | Atr            | NM_033593.2        | Pcdhga10      | NM_009062        | Rgs4          | NM_022004 | Fxyd6       |
| NM_007549.2        | Blk            | NM_033585.1        | Pcdhga2       | NM_009173        | Siah1b        | NM_172371 | Slc16a13    |
| XM_125706.5        | Bcr            | NM_145630.1        | Pdk3          | NM_177353        | Slc9a7        | NM_178651 | Slc30a9     |
| NM_010238.1        | Brd2           | NM_012025.3        | Racgap1       | NM_080450        | Gje1          | NM_011731 | Slc6a20b    |
| NM_007726.1        | Cnr1           | NM_025346.1        | Rmnd5b        | NM_028981        | Cacna1d       | XM_135197 | Ptpn23      |
| <b>NM_134002.1</b> | <b>Csnk1g2</b> | NM_172525.1        | Arhgap29      | NM_009784        | Cacna2d1      | XM_142281 | Ppef1       |
| NM_152809.1        | Csnk1g3        | NM_025818          | 1200014J11Rik | NM_009783        | Cacna1g       | NM_172117 | Entpd6      |
| NM_010828.1        | Cited2         | NM_025564          | Magohb        | <b>NM_031173</b> | <b>Cacnb1</b> | NM_177242 | Pptc7       |
| NM_153568.1        | Lrrc66         | NM_025620.1        | Rep15         | NM_019715        | Kcmf1         | NM_008532 | Epcam       |
| NM_201374.1        | Ccdc155        | NM_025739.2        | Rnf220        | NM_172695        | Plaa          | NM_145480 | Rfc4        |
| NM_173422.1        | Colec10        | NM_173023.1        | Catsperb      | XM_127051        | Sos2          | NM_175020 | Prss58      |
| NM_007573.1        | C1qbp          | NM_028993          | Mau2          | NM_134083        | Rcbtb2        | NM_177474 | D19Bwg1357e |
| NM_013715.1        | Cops5          | NM_172625.1        | Ino80c        | NM_028976        | Gorasp1       | NM_010584 | Itln1       |
| NM_172732.1        | Clec9a         | NM_001005477.1     | Barhl2        | NM_010400        | H60a          | NM_010058 | Dmwd        |
| <b>NM_172928</b>   | <b>Dclk3</b>   | NM_033604.1        | Rnf111        | XM_148373        | Cpn2          | NM_025330 | Hsd17b14    |
| NM_178704.2        | Dpy19l3        | <b>NM_198251.1</b> | <b>Rnf133</b> | <b>NM_009964</b> | <b>Cryab</b>  | NM_025910 | Mina        |
| NM_007951.1        | Erh            | NM_025999.1        | Rnf141        | NM_026840        | Pdgfrl        | NM_198305 | Klhl17      |

|                    |             |                    |              |                  |              |              |            |
|--------------------|-------------|--------------------|--------------|------------------|--------------|--------------|------------|
| NM_010142.1        | Ephb2       | NM_011278.1        | Rnf4         | NM_145627        | Rbm10        | NM_001024911 | Sept10     |
| NM_007911.3        | Efnb3       | NM_024182.2        | Riok3        | NM_144875        | Rab71l1      | NM_177759    | Ccdc60     |
| NM_007907.1        | Eef2        | NM_016741.1        | Scarb1       | NM_030211        | Kctd18       | NM_008537    | Amacr      |
| NM_134154          | Slc25a45    | XM_358897.1        | Stk33        | NM_053083        | Loxl4        | NM_207222    | Lmo3       |
| NM_010188.3        | Fcgr3       | NM_028800.2        | Stk40        | NM_009018        | Raet1c       | NM_010214    | Fhl4       |
| NM_020009.2        | mTOR        | NM_001037248       | Gm4567       | <b>NM_008337</b> | <b>lfng</b>  | NM_021339    | Cdon       |
| NM_008029.1        | Flt4        | NM_170756.1        | Spata2       | NM_007843        | Defb1        | NM_001008705 | Bud31      |
| NM_176912          | C5ar2       | NM_175502.2        | Tmem74       | NM_028636        | Man2c1       | NM_013601    | Msx2       |
| NM_013559          | Hsph1       | NM_053084.1        | Trim32       | NM_010957        | Ogg1         | NM_172831    | E230025N22 |
| NM_010391.1        | H2-Q10      | NM_030684          | Trim34a      | NM_009979        | Cst9         | NM_027350    | Nars       |
| NM_015755.1        | Hunk        | NM_178240.1        | Trim50       | NM_022315        | Smoc2        | NM_008996    | Rab1       |
| NM_053122.2        | Immp2l      | <b>NM_053166.1</b> | <b>Trim7</b> | <b>NM_009242</b> | <b>Sparc</b> | NM_019401    | Nmi        |
| NM_008380.1        | Inhba       | NM_053167.1        | Trim9        | NM_153459        | Dusp7        | NM_025914    | Actr6      |
| NM_008401.1        | Itgam       | NM_019548.2        | Tro          | NM_007700        | Chuk         | NM_025274    | Dppa5a     |
| NM_008402.1        | Itgav       | NM_016788.1        | Tnk2         | NM_011694        | Vdac1        | NM_010758    | Mag        |
| NM_145467.1        | Itgbl1      | NM_023230.1        | Ube2v1       | NM_021514        | Pfkm         | NM_026845    | Ppil1      |
| NM_008354.1        | Il12rb2     | NM_023585.2        | Ube2v2       | NM_016681        | Chek2        | NM_010663    | Krt1-17    |
| NM_008355.1        | Il13        | NM_175309.3        | Upk3b        | NM_172053        | Adamts16     | NM_008469    | Krt1-15    |
| <b>NM_146145.1</b> | <b>Jak1</b> | NM_011705.2        | Vrk1         | NM_144871        | Suv420h1     | NM_032610    | Spnb4      |
| NM_021310.1        | Jmy         | XM_109715.3        | Erbp2        | NM_207225        | Hdac4        | NM_010630    | Kifc2      |
| NM_010612.2        | Kdr         | NM_134233          | Vmn1r84      | NM_008084        | gapdh        | XM_621314    | Dsp        |
| NM_008483.2        | Lamb2       | NM_019653.2        | Wsb1         | NM_198030        | Hsd17b13     | NM_030238    | Dync1h1    |

|                    |             |                  |              |              |           |                     |                 |
|--------------------|-------------|------------------|--------------|--------------|-----------|---------------------|-----------------|
| NM_022964.3        | Lat2        | NM_178398.2      | Wipi2        | NM_010880    | Ncl       | NM_010135           | Enah            |
| NM_022801.1        | Mark3       | NM_199143.1      | Znrf2        | NM_007999    | Fen1      | NM_011597           | Tjp2            |
| NM_010790.2        | Melk        | NM_024467.3      | Zfp319       | NM_007949    | Ercc2     | NM_001033239        | Csta1           |
| NM_152944.1        | Mmp21       | NM_028259        | Rps6kb1      | NM_010715    | Lig1      | XM_489716           | UNK             |
| NM_019453.1        | Mefv        | NM_030720        | Gpr84        | NM_007503    | Fxyd2     | XR_406381           | LOC102640328    |
| NM_010768.1        | Matk        | NM_008157        | Gpr19        | NM_016678    | Reck      | NM_175020           | Prss58          |
| NM_008612.1        | Mnat1       | NM_181749        | Gpr142       | NM_009358    | Ppp2r5d   | NM_177848           | 9430083122      |
| <b>NM_139300.2</b> | <b>Mylk</b> | <b>NM_007955</b> | <b>Ptprv</b> | NM_030251    | Abtb1     | NM_001162864        | Ttbk1           |
| NM_031375.2        | Ngrn        | <b>NM_010165</b> | <b>Eya2</b>  | NM_010426    | Foxf1     | <b>NM_001039889</b> | <b>Smoc2b</b>   |
| NM_022029.1        | Nrgn        | NM_010166        | Eya3         | NM_177162    | Tmprss11g | NM_001201364        | Gm10662         |
| NM_199465.1        | Nexn        | NM_011202        | Ptpn11       | NM_001101453 | Ace3      | NM_025647           | Cmpk1           |
| NM_146365.1        | Olfir1094   | NM_012047        | Brd7         | XM_283777    | Cst11     | NM_001077529        | Nme2            |
| NM_146514.1        | Olfir96     | NM_146461        | Olfir1209    | NM_008686    | Nfe2l1    | NM_008828           | Pgk1            |
| NM_147107.1        | Olfir974    | NM_013528        | Gfpt1        | NM_007923    | Elk4      | NM_080560           | Ube2n           |
| NM_013887.1        | Opn4        | NM_198672        | Ces3a        | NM_009560    | Zfp60     | NM_001289798        | Hadhb           |
| NM_020005          | Kat2b       | NM_023149        | Cndp2        | NM_026888    | Phkg2     | <b>XM_006543380</b> | <b>Gm318</b>    |
| NM_026951          | Pex11g      | NM_133960        | Ces2a        | NM_053122    | Immmp2l   | <b>NM_001033285</b> | <b>Cdc42bpa</b> |
| NM_011143.2        | Pou4f1      | NM_010315        | Gng2         | XM_484053    | Taok1     | NM_001130477        | Srrm1           |
| NM_011192.2        | Psme3       | NM_001167923.1   | Col6a5       | XM_487135    | Gm5174    |                     |                 |

Number of hits are shown as follows: One Clone, **Two Clones**, **Three Clones**
